# Supplementary material for: Highly Cited Articles in the Field of Male Infertility and Antioxidants: A Scientometric Analysis
Source: PubMed Central journal article supplement — World J Mens Health. 2021 Feb 8;39(4):760–75. doi: 10.5534/wjmh.200181 (PMC8443986; doi:10.5534/wjmh.200181), 2021-02-08
Supplement: wjmh-39-760-s001.pdf [file wjmh-39-760-s001.pdf]

**Supplement Table 1.** The distribution and frequency of individual antioxidants (n=22) used in original articles (n=69) investigating antioxidants in male infertility

| Individual antioxidant      | Number of studies |
|-----------------------------|-------------------|
| Vitamin E                   | 5                 |
| Carnitines                  | 3                 |
| N-acetyl cysteine           | 3                 |
| Lycopene                    | 3                 |
| Coenzyme Q10                | 2                 |
| Melatonin                   | 2                 |
| Vitamin C                   | 2                 |
| <i>Mucana pruriens</i>      | 2                 |
| <i>Withania somnifera</i>   | 2                 |
| $\beta$ -carotenes          | 1                 |
| Folic acid                  | 1                 |
| Myoinositol                 | 1                 |
| Pentoxifylline              | 1                 |
| Propolis                    | 1                 |
| Resveratrol                 | 1                 |
| Ubiquinol                   | 1                 |
| Zinc                        | 1                 |
| <i>Ceratonia siliqua</i>    | 1                 |
| <i>Crocus sativus</i>       | 1                 |
| <i>Sesamum indicum</i>      | 1                 |
| <i>Spirulina platensis</i>  | 1                 |
| <i>Zingiber officinalis</i> | 1                 |
