# Supplementary material for: Highly Cited Articles in the Field of Male Infertility and Antioxidants: A Scientometric Analysis
Source: PubMed Central journal article supplement — World J Mens Health. 2021 Feb 8;39(4):760–75. doi: 10.5534/wjmh.200181 (PMC8443986; doi:10.5534/wjmh.200181), 2021-02-08
Supplement: wjmh-39-760-s002.pdf [file wjmh-39-760-s002.pdf]

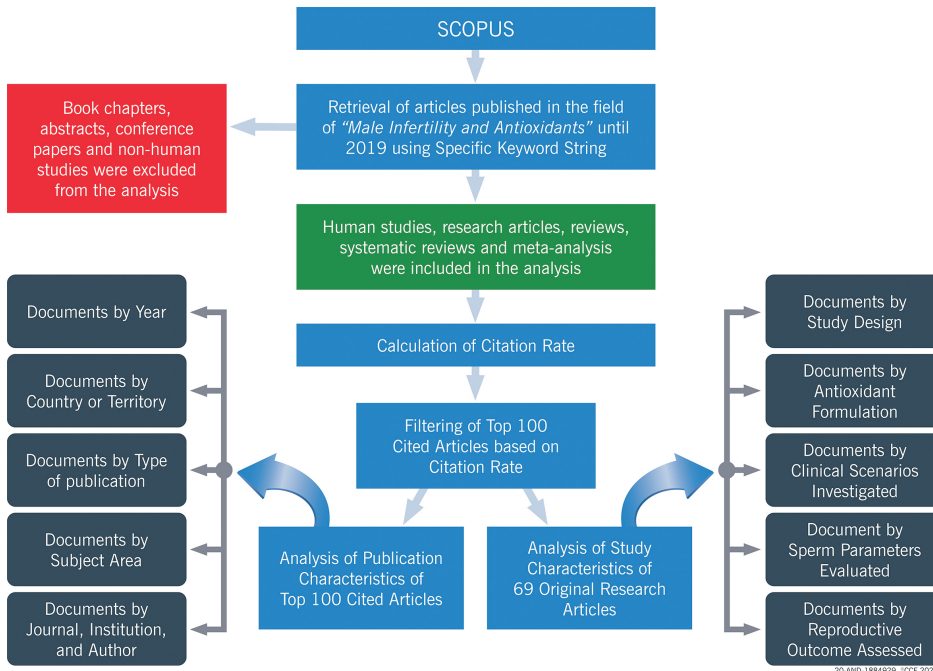

**Supplement Fig. 1.** Flow diagram displaying the analysis of top cited articles in the field of male infertility and antioxidants.
